# Supplementary material
Source: PubMed Central journal article supplement (PMC4849827)
Supplement: ASN.2015040345_ASN2015040345SupplementaryData.pdf [file ASN.2015040345_ASN2015040345SupplementaryData.pdf]

## **APPENDICES**

**Appendix 1/Table S1:** Relative risk of donor acute kidney injury associated with urinary creatinine and creatinine-indexed urinary biomarker concentrations

|                         |                 |                             |                       | <b>Relative Risk (95% CI) for Severe AKI</b> |                              |
|-------------------------|-----------------|-----------------------------|-----------------------|----------------------------------------------|------------------------------|
| <b>Urine Biomarker</b>  | <b>Quantile</b> | <b>Range</b>                | <b>Event Rate (%)</b> | <b>Unadjusted</b>                            | <b>Adjusted <sup>1</sup></b> |
| Creatinine              | Q1              | $n_1=434$ [0.02, 20.63]     | 28 (6%)               | 1.0 (referent)                               | 1.0 (referent)               |
|                         | Q2              | $n_2=435$ [20.66, 54.29]    | 50 (11%)              | 1.59 (1.01, 2.50)                            | 1.64 (1.04, 2.58)            |
|                         | Q3              | $n_3=434$ [54.52, 381.73]   | 34 (8%)               | 1.09 (0.67, 1.78)                            | 1.03 (0.62, 1.69)            |
| Microalbumin/Creatinine | Q1              | $n_1=402$ [0.00, 0.04]      | 13 (3%)               | 1.0 (referent)                               | 1.0 (referent)               |
|                         | Q2              | $n_2=403$ [0.04, 0.11]      | 23 (6%)               | 1.77 (0.91, 3.44)                            | 1.88 (0.97, 3.67)            |
|                         | Q3              | $n_3=402$ [0.11, 6.39]      | 73 (18%)              | 5.62 (3.16, 9.97)                            | 6.18 (3.47, 11.00)           |
| NGAL/Creatinine         | Q1              | $n_1=434$ [0.00, 0.56]      | 15 (3%)               | 1.0 (referent)                               | 1.0 (referent)               |
|                         | Q2              | $n_2=434$ [0.56, 2.78]      | 22 (5%)               | 1.46 (0.77, 2.78)                            | 1.50 (0.78, 2.87)            |
|                         | Q3              | $n_3=434$ [2.81, 23254.29]  | 75 (17%)              | 5.57 (3.25, 9.54)                            | 6.21 (3.63, 10.62)           |
| KIM-1/Creatinine        | Q1              | $n_1=434$ [0.64, 30.24]     | 31 (7%)               | 1.0 (referent)                               | 1.0 (referent)               |
|                         | Q2              | $n_2=434$ [30.37, 69.15]    | 31 (7%)               | 1.01 (0.63, 1.63)                            | 1.11 (0.67, 1.82)            |
|                         | Q3              | $n_3=434$ [69.16, 25343.75] | 49 (11%)              | 1.81 (1.18, 2.79)                            | 2.00 (1.26, 3.16)            |
| IL-18/Creatinine        | Q1              | $n_1=434$ [0.02, 0.85]      | 16 (4%)               | 1.0 (referent)                               | 1.0 (referent)               |
|                         | Q2              | $n_2=434$ [0.86, 2.23]      | 30 (7%)               | 1.89 (1.05, 3.42)                            | 1.99 (1.10, 3.60)            |
|                         | Q3              | $n_3=434$ [2.24, 1695.43]   | 66 (15%)              | 4.69 (2.76, 7.96)                            | 5.14 (3.02, 8.75)            |
| L-FABP/Creatinine       | Q1              | $n_1=433$ [0.00, 0.20]      | 14 (3%)               | 1.0 (referent)                               | 1.0 (referent)               |
|                         | Q2              | $n_2=433$ [0.20, 0.99]      | 25 (6%)               | 1.77 (0.93, 3.36)                            | 1.82 (0.95, 3.49)            |
|                         | Q3              | $n_3=433$ [0.99, 2252.25]   | 72 (17%)              | 5.80 (3.33, 10.12)                           | 6.31 (3.62, 11.02)           |

|                        |                 |              |                       | <b>Relative Risk (95% CI) for Severe AKI</b> |                              |
|------------------------|-----------------|--------------|-----------------------|----------------------------------------------|------------------------------|
| <b>Urine Biomarker</b> | <b>Quantile</b> | <b>Range</b> | <b>Event Rate (%)</b> | <b>Unadjusted</b>                            | <b>Adjusted <sup>1</sup></b> |

Acute kidney injury (AKI) was defined as at least a 2-fold increase in donor serum creatinine from the admission to terminal value.

<sup>1</sup> Adjusted for the donor variables that comprise the KDRI, except terminal serum creatinine. These are: age (years), height (cm), weight (kg), Black race, history of hypertension, history of diabetes, stroke as cause of death, HCV status, and DCD status.

**Appendix 2/Table S2:** Donor urinary biomarker concentrations, by recipient delayed graft function status

| Urine Biomarker                            | ALL<br>(N=2441)              | No DGF<br>(N=1685)           | DGF<br>(N=756)               | P*     |
|--------------------------------------------|------------------------------|------------------------------|------------------------------|--------|
| Microalbumin, mg/dL                        | 1.97<br>[0.66, 5.47]         | 1.76<br>[0.61, 4.95]         | 2.32<br>[0.8, 6.48]          | <0.001 |
| NGAL, ng/mL                                | 39.6<br>[12.3, 135.8]        | 34<br>[10.5, 106.1]          | 53.7<br>[17.8, 214.5]        | <0.001 |
| KIM-1, pg/mL                               | 1360.95<br>[624.23, 3201.52] | 1314.87<br>[591.64, 3077.98] | 1584.56<br>[717.37, 3356.05] | 0.001  |
| IL-18, pg/mL                               | 43.4<br>[19.97, 106.98]      | 40.5<br>[17.94, 99.69]       | 52.2<br>[24.98, 126.69]      | <0.001 |
| L-FABP, pg/mL                              | 12.4<br>[3.6, 54.4]          | 10.8<br>[3.2, 43.2]          | 16<br>[4.4, 72.4]            | <0.001 |
| Creatinine, mg/mL                          | 36.18<br>[14.45, 67.3]       | 34.76<br>[13.53, 66.17]      | 38.19<br>[17.2, 70.31]       | 0.042  |
| <b>Creatinine-Indexed Urine Biomarkers</b> |                              |                              |                              |        |
| Microalbumin/Creatinine                    | 0.06<br>[0.03, 0.14]         | 0.06<br>[0.03, 0.14]         | 0.07<br>[0.03, 0.14]         | 0.186  |
| NGAL/Creatinine                            | 1.07<br>[0.37, 5.24]         | 0.96<br>[0.33, 4]            | 1.49<br>[0.48, 10.17]        | <0.001 |
| KIM-1/Creatinine                           | 43.18<br>[22.76, 89.15]      | 41.36<br>[22.14, 85.49]      | 46.46<br>[24.55, 96.67]      | 0.037  |
| IL-18/Creatinine                           | 1.29<br>[0.65, 3.17]         | 1.26<br>[0.64, 2.83]         | 1.49<br>[0.69, 4.42]         | 0.004  |
| L-FABP/Creatinine                          | 0.43<br>[0.14, 1.54]         | 0.4<br>[0.13, 1.37]          | 0.54<br>[0.17, 1.97]         | <0.001 |

Values reported are median [interquartile range].

\* Wilcoxon rank sum test.

**Appendix 3/Table S3:** Statistics related to improvement in prediction of delayed graft function with the addition of donor urinary biomarkers to statistical models

| Urine Biomarker         | Stat              | Estimate | SE    | P     |
|-------------------------|-------------------|----------|-------|-------|
| <b>log Microalbumin</b> | $\Delta$ AUC      | 0.000    |       | 0.890 |
|                         | IDI               | 0.000    | 0.000 | 0.460 |
|                         | NRI               | 0.004    | 0.002 | 0.074 |
|                         | NRI <sub>ne</sub> | 0.006    |       |       |
|                         | NRI <sub>e</sub>  | -0.001   |       |       |
| <b>log NGAL</b>         | $\Delta$ AUC      | 0.003    |       | 0.076 |
|                         | IDI               | 0.002    | 0.001 | 0.031 |
|                         | NRI               | 0.008    | 0.005 | 0.124 |
|                         | NRI <sub>ne</sub> | 0.011    |       |       |
|                         | NRI <sub>e</sub>  | -0.003   |       |       |
| <b>log KIM-1</b>        | $\Delta$ AUC      | 0.001    |       | 0.350 |
|                         | IDI               | 0.001    | 0.001 | 0.235 |
|                         | NRI               | 0.003    | 0.004 | 0.339 |
|                         | NRI <sub>ne</sub> | 0.006    |       |       |
|                         | NRI <sub>e</sub>  | -0.003   |       |       |
| <b>log IL-18</b>        | $\Delta$ AUC      | 0.001    |       | 0.258 |
|                         | IDI               | 0.000    | 0.000 | 0.380 |
|                         | NRI               | 0.002    | 0.003 | 0.370 |
|                         | NRI <sub>ne</sub> | 0.004    |       |       |
|                         | NRI <sub>e</sub>  | -0.001   |       |       |
| <b>log L-FABP</b>       | $\Delta$ AUC      | 0.000    |       | 0.380 |
|                         | IDI               | 0.000    | 0.000 | 0.499 |
|                         | NRI               | -0.001   | 0.002 | 0.559 |
|                         | NRI <sub>ne</sub> | 0.000    |       |       |
|                         | NRI <sub>e</sub>  | -0.001   |       |       |

Area under the curve (AUC) of clinical model is 0.714. Predictors used for clinical model are: donor age (years), height (cm), weight (kg), black race, history of hypertension, history of diabetes, stroke as cause of death, hepatitis C serostatus, donation after circulatory determination of death, and terminal serum creatinine (mg/dL). Casewise deletion was applied to missing values of all biomarkers, resulting in 2258 observations. Pre-specified risk categories for the NRI were defined as low (<5%), medium (5-10%), or high (>10%) risk.

$\Delta$ AUC = change in AUC after adding the biomarker to the clinical model

IDI=integrated discrimination improvement

NRI=Overall Net Reclassification Improvement calculated as NRI<sub>ne</sub> + NRI<sub>e</sub>

NRI<sub>ne</sub> = Non-Event Net Reclassification Improvement.

NRI<sub>e</sub> = Event Net Reclassification Improvement.

**Appendix 4/Table S4:** Relative risk of delayed graft function after kidney transplantation associated with donor urinary creatinine and creatinine-indexed urinary biomarker concentrations

|                             |          |                             |                | Relative Risk (95% CI) for DGF |                                                |                                                 |                                                                   |
|-----------------------------|----------|-----------------------------|----------------|--------------------------------|------------------------------------------------|-------------------------------------------------|-------------------------------------------------------------------|
| Urine Biomarker             | Quantile | Range                       | Event Rate (%) | Unadjusted                     | Adjusted for donor variables only <sup>1</sup> | Adjusted for donor variables & SCr <sup>2</sup> | Adjusted for donor, transport, & recipient variables <sup>3</sup> |
| Microalbumin/<br>Creatinine | Q1       | $n_1=753$ [0.00, 0.04]      | 233 (31%)      | 1.0 (referent)                 | 1.0 (referent)                                 | 1.0 (referent)                                  | 1.0 (referent)                                                    |
|                             | Q2       | $n_2=753$ [0.04, 0.11]      | 216 (29%)      | 0.93 (0.79, 1.11)              | 0.94 (0.80, 1.10)                              | 0.92 (0.78, 1.07)                               | 0.96 (0.82, 1.13)                                                 |
|                             | Q3       | $n_3=754$ [0.11, 6.39]      | 241 (32%)      | 1.04 (0.88, 1.22)              | 1.03 (0.88, 1.20)                              | 0.87 (0.74, 1.02)                               | 0.91 (0.78, 1.07)                                                 |
| NGAL/<br>Creatinine         | Q1       | $n_1=813$ [0.00, 0.54]      | 213 (26%)      | 1.0 (referent)                 | 1.0 (referent)                                 | 1.0 (referent)                                  | 1.0 (referent)                                                    |
|                             | Q2       | $n_2=811$ [0.55, 2.70]      | 243 (30%)      | 1.17 (0.98, 1.39)              | 1.12 (0.95, 1.32)                              | 1.08 (0.92, 1.28)                               | 1.05 (0.90, 1.24)                                                 |
|                             | Q3       | $n_3=813$ [2.73, 23254.29]  | 300 (37%)      | 1.42 (1.20, 1.69)              | 1.42 (1.21, 1.67)                              | 1.14 (0.96, 1.36)                               | 1.17 (0.99, 1.39)                                                 |
| KIM-1/<br>Creatinine        | Q1       | $n_1=813$ [0.64, 29.98]     | 232 (29%)      | 1.0 (referent)                 | 1.0 (referent)                                 | 1.0 (referent)                                  | 1.0 (referent)                                                    |
|                             | Q2       | $n_2=812$ [30.01, 68.36]    | 255 (31%)      | 1.10 (0.93, 1.30)              | 1.14 (0.98, 1.34)                              | 1.09 (0.94, 1.28)                               | 1.08 (0.93, 1.26)                                                 |
|                             | Q3       | $n_3=812$ [68.52, 25343.75] | 269 (33%)      | 1.11 (0.94, 1.32)              | 1.19 (1.01, 1.41)                              | 1.09 (0.92, 1.28)                               | 1.07 (0.91, 1.26)                                                 |
| IL-18/<br>Creatinine        | Q1       | $n_1=812$ [0.02, 0.84]      | 237 (29%)      | 1.0 (referent)                 | 1.0 (referent)                                 | 1.0 (referent)                                  | 1.0 (referent)                                                    |
|                             | Q2       | $n_2=813$ [0.84, 2.21]      | 226 (28%)      | 0.96 (0.81, 1.15)              | 1.01 (0.86, 1.19)                              | 0.98 (0.83, 1.15)                               | 1.00 (0.86, 1.17)                                                 |
|                             | Q3       | $n_3=812$ [2.21, 1695.43]   | 293 (36%)      | 1.24 (1.06, 1.47)              | 1.23 (1.05, 1.44)                              | 1.05 (0.89, 1.24)                               | 1.06 (0.90, 1.25)                                                 |
| L-FABP/<br>Creatinine       | Q1       | $n_1=810$ [0.00, 0.20]      | 217 (27%)      | 1.0 (referent)                 | 1.0 (referent)                                 | 1.0 (referent)                                  | 1.0 (referent)                                                    |
|                             | Q2       | $n_2=811$ [0.20, 0.98]      | 251 (31%)      | 1.18 (0.99, 1.39)              | 1.20 (1.03, 1.40)                              | 1.15 (0.98, 1.34)                               | 1.14 (0.97, 1.32)                                                 |
|                             | Q3       | $n_3=811$ [0.99, 2252.25]   | 287 (35%)      | 1.31 (1.10, 1.56)              | 1.29 (1.09, 1.52)                              | 1.08 (0.91, 1.29)                               | 1.07 (0.90, 1.26)                                                 |

<sup>1</sup> Donor variables used for adjustment: age (years), height (cm), weight (kg), Black race, history of hypertension, history of diabetes, stroke as cause of death, HCV status, and DCD status.

<sup>2</sup> Includes donor variables listed above plus terminal serum creatinine.

<sup>3</sup> Includes all variables listed above plus cold ischemia time and the following recipient variables: age (years), black race, gender, previous kidney transplant, diabetes as the cause of end stage renal disease, need for pre-transplant blood transfusion, number of human leukocyte antigen mismatches, panel reactive antibody (%), body mass index, and pre-transplant dialysis.

**Appendix 5/ Table S5:** Regression of 6-month eGFR (ml/min/1.73 m<sup>2</sup>)\* on delayed graft function

|                  | <b>Linear Regression Coefficient (95% CI)</b> |                                                      |                                                           |                                                                             |
|------------------|-----------------------------------------------|------------------------------------------------------|-----------------------------------------------------------|-----------------------------------------------------------------------------|
|                  | <b>Unadjusted</b>                             | <b>Adjusted for donor variables only<sup>1</sup></b> | <b>Adjusted for donor variables &amp; SCr<sup>2</sup></b> | <b>Adjusted for donor, transport, &amp; recipient variables<sup>3</sup></b> |
| DGF (vs. no DGF) | -11.53 (-13.53, -9.54)                        | -8.95 (-10.85, -7.04)                                | -8.64 (-10.58, -6.71)                                     | -7.53 (-9.51, -5.55)                                                        |

\* eGFR calculated using Chronic Kidney Disease Epidemiology Collaboration equation.

<sup>1</sup> Donor variables used for adjustment: age (years), height (cm), weight (kg), Black race, history of hypertension, history of diabetes, stroke as cause of death, HCV status, and DCD status.

<sup>2</sup> Includes donor variables listed above plus terminal serum creatinine.

<sup>3</sup> Includes all variables listed above plus cold ischemia time and the following recipient variables: age (years), black race, gender, previous kidney transplant, diabetes as the cause of end stage renal disease, need for pre-transplant blood transfusion, number of human leukocyte antigen mismatches, body mass index, and pre-transplant dialysis.

**Appendix 6/Table S6:** Regression of 6-month eGFR on urine biomarker tertiles: Recipients without delayed graft function (n=1685)

|              |          |                               | Linear Regression Coefficient (95% CI) |                                                |                                                 |                                                                   |
|--------------|----------|-------------------------------|----------------------------------------|------------------------------------------------|-------------------------------------------------|-------------------------------------------------------------------|
| Biomarker    | Quantile | Range                         | Unadjusted                             | Adjusted for donor variables only <sup>1</sup> | Adjusted for donor variables & SCr <sup>2</sup> | Adjusted for donor, transport, & recipient variables <sup>3</sup> |
| Microalbumin | Q1       | $n_1=563$ [0.50, 0.89]        | (Referent)                             | (Referent)                                     | (Referent)                                      | (Referent)                                                        |
|              | Q2       | $n_2=504$ [0.90, 3.84]        | -1.99 (-5.14, 1.17)                    | 0.40 (-2.32, 3.13)                             | 0.70 (-2.02, 3.42)                              | 0.73 (-1.96, 3.43)                                                |
|              | Q3       | $n_3=503$ [3.86, 44.86]       | -4.88 (-7.87, -1.90)                   | -2.44 (-5.10, 0.22)                            | -1.59 (-4.30, 1.11)                             | -1.81 (-4.49, 0.86)                                               |
| NGAL         | Q1       | $n_1=620$ [0.00, 18.10]       | (Referent)                             | (Referent)                                     | (Referent)                                      | (Referent)                                                        |
|              | Q2       | $n_2=565$ [18.20, 83.40]      | -3.60 (-6.67, -0.52)                   | -1.76 (-4.48, 0.97)                            | -1.49 (-4.21, 1.23)                             | -1.27 (-3.99, 1.44)                                               |
|              | Q3       | $n_3=496$ [83.60, 6000.00]    | -4.40 (-7.47, -1.33)                   | -3.15 (-5.81, -0.50)                           | -1.84 (-4.67, 1.00)                             | -1.40 (-4.23, 1.43)                                               |
| KIM-1        | Q1       | $n_1=600$ [58.96, 843.30]     | (Referent)                             | (Referent)                                     | (Referent)                                      | (Referent)                                                        |
|              | Q2       | $n_2=548$ [844.28, 2430.76]   | -0.95 (-4.13, 2.22)                    | -0.83 (-3.56, 1.90)                            | -0.63 (-3.34, 2.08)                             | -0.66 (-3.35, 2.03)                                               |
|              | Q3       | $n_3=535$ [2432.46, 37759.01] | -2.40 (-5.37, 0.57)                    | -1.06 (-3.68, 1.57)                            | -0.75 (-3.37, 1.87)                             | -0.10 (-2.68, 2.48)                                               |
| IL-18        | Q1       | $n_1=605$ [2.58, 26.59]       | (Referent)                             | (Referent)                                     | (Referent)                                      | (Referent)                                                        |
|              | Q2       | $n_2=558$ [26.63, 76.69]      | -1.20 (-4.35, 1.95)                    | -1.34 (-4.03, 1.35)                            | -1.25 (-3.93, 1.43)                             | -1.22 (-3.85, 1.41)                                               |
|              | Q3       | $n_3=518$ [77.41, 1448.69]    | -3.61 (-6.62, -0.60)                   | -2.54 (-5.19, 0.11)                            | -1.63 (-4.36, 1.09)                             | -1.13 (-3.87, 1.61)                                               |
| L-FABP       | Q1       | $n_1=601$ [1.00, 5.60]        | (Referent)                             | (Referent)                                     | (Referent)                                      | (Referent)                                                        |
|              | Q2       | $n_2=570$ [6.00, 30.00]       | -2.70 (-5.76, 0.36)                    | -1.55 (-4.22, 1.11)                            | -1.23 (-3.88, 1.42)                             | -1.52 (-4.13, 1.10)                                               |
|              | Q3       | $n_3=508$ [30.40, 250.00]     | -5.01 (-8.16, -1.86)                   | -3.56 (-6.30, -0.83)                           | -2.66 (-5.47, 0.14)                             | -2.32 (-5.10, 0.47)                                               |
| Creatinine   | Q1       | $n_1=594$ [0.04, 20.69]       | (Referent)                             | (Referent)                                     | (Referent)                                      | (Referent)                                                        |
|              | Q2       | $n_2=545$ [20.78, 54.75]      | 0.90 (-2.15, 3.94)                     | -0.74 (-3.44, 1.95)                            | -0.55 (-3.22, 2.13)                             | -0.19 (-2.83, 2.46)                                               |
|              | Q3       | $n_3=544$ [54.76, 381.73]     | -0.89 (-4.04, 2.25)                    | -2.01 (-4.81, 0.79)                            | -1.92 (-4.70, 0.86)                             | -1.07 (-3.86, 1.71)                                               |

<sup>1</sup> Donor variables used for adjustment: age (years), height (cm), weight (kg), Black race, history of hypertension, history of diabetes, stroke as cause of death, HCV status, and DCD status.

<sup>2</sup> Includes donor variables listed above plus terminal serum creatinine.

<sup>3</sup> Includes all variables listed above plus cold ischemia time and the following recipient variables: age (years), black race, gender, previous kidney transplant, diabetes as the cause of end stage renal disease, need for pre-transplant blood transfusion, number of human leukocyte antigen mismatches, panel reactive antibody (%), body mass index, and pre-transplant dialysis.

P-values for biomarker x DGF interaction term (separate models) are: microalbumin,  $p = 0.015$ ; NGAL,  $p < 0.001$ ; KIM-1,  $p = 0.290$ ; IL-18,  $p = 0.014$ ; L-FABP,  $p = 0.006$

**Appendix 7/Table S7:** Regression of 6-month eGFR on Biomarker Tertiles, Recipients with Delayed Graft Function (n=756)

|                 |          |                               | Linear Regression Coefficient (95% CI) |                                                |                                                 |                                                                   |
|-----------------|----------|-------------------------------|----------------------------------------|------------------------------------------------|-------------------------------------------------|-------------------------------------------------------------------|
| Urine Biomarker | Quantile | Range                         | Unadjusted                             | Adjusted for donor variables only <sup>1</sup> | Adjusted for donor variables & SCr <sup>2</sup> | Adjusted for donor, transport, & recipient variables <sup>3</sup> |
| Microalbumin    | Q1       | $n_1=192$ [0.50, 0.89]        | (Referent)                             | (Referent)                                     | (Referent)                                      | (Referent)                                                        |
|                 | Q2       | $n_2=247$ [0.91, 3.80]        | -0.06 (-4.83, 4.70)                    | 1.32 (-2.92, 5.55)                             | 1.40 (-2.84, 5.64)                              | 1.35 (-2.94, 5.63)                                                |
|                 | Q3       | $n_3=251$ [3.86, 44.86]       | 2.10 (-2.76, 6.96)                     | 2.38 (-1.99, 6.75)                             | 2.63 (-1.96, 7.23)                              | 3.00 (-1.63, 7.62)                                                |
| NGAL            | Q1       | $n_1=193$ [0.00, 18.10]       | (Referent)                             | (Referent)                                     | (Referent)                                      | (Referent)                                                        |
|                 | Q2       | $n_2=246$ [18.30, 83.40]      | -1.71 (-6.70, 3.28)                    | -0.33 (-4.86, 4.21)                            | -0.22 (-4.78, 4.34)                             | -0.16 (-4.86, 4.54)                                               |
|                 | Q3       | $n_3=317$ [84.50, 8792.38]    | 2.62 (-2.04, 7.27)                     | 1.63 (-2.55, 5.81)                             | 2.04 (-2.38, 6.46)                              | 2.28 (-2.18, 6.74)                                                |
| KIM-1           | Q1       | $n_1=213$ [58.96, 831.84]     | (Referent)                             | (Referent)                                     | (Referent)                                      | (Referent)                                                        |
|                 | Q2       | $n_2=266$ [844.28, 2430.76]   | -3.96 (-8.64, 0.72)                    | -2.99 (-7.18, 1.20)                            | -2.99 (-7.18, 1.20)                             | -2.94 (-7.18, 1.31)                                               |
|                 | Q3       | $n_3=277$ [2432.46, 37759.01] | -1.53 (-6.32, 3.25)                    | -0.26 (-4.43, 3.90)                            | -0.25 (-4.43, 3.93)                             | 0.31 (-4.03, 4.65)                                                |
| IL-18           | Q1       | $n_1=207$ [2.58, 26.56]       | (Referent)                             | (Referent)                                     | (Referent)                                      | (Referent)                                                        |
|                 | Q2       | $n_2=255$ [26.68, 74.44]      | 1.68 (-3.26, 6.62)                     | 2.37 (-2.03, 6.77)                             | 2.42 (-1.96, 6.80)                              | 2.98 (-1.40, 7.37)                                                |
|                 | Q3       | $n_3=294$ [77.41, 1448.69]    | 4.16 (-0.47, 8.80)                     | 5.17 (0.95, 9.39)                              | 5.47 (1.18, 9.77)                               | 5.53 (1.20, 9.85)                                                 |
| L-FABP          | Q1       | $n_1=214$ [1.00, 5.60]        | (Referent)                             | (Referent)                                     | (Referent)                                      | (Referent)                                                        |
|                 | Q2       | $n_2=237$ [6.00, 30.00]       | -0.22 (-4.97, 4.52)                    | -0.53 (-4.87, 3.82)                            | -0.44 (-4.81, 3.94)                             | -0.36 (-4.85, 4.13)                                               |
|                 | Q3       | $n_3=304$ [30.40, 250.00]     | 3.39 (-1.30, 8.08)                     | 2.50 (-1.85, 6.84)                             | 2.79 (-1.78, 7.36)                              | 3.47 (-1.10, 8.05)                                                |

<sup>1</sup> Donor variables used for adjustment: age (years), height (cm), weight (kg), Black race, history of hypertension, history of diabetes, stroke as cause of death, HCV status, and DCD status.

<sup>2</sup> Includes donor variables listed above plus terminal serum creatinine.

<sup>3</sup> Includes all variables listed above plus cold ischemia time and the following recipient variables: age (years), black race, gender, previous kidney transplant, diabetes as the cause of end stage renal disease, need for pre-transplant blood transfusion, number of human leukocyte antigen mismatches, panel reactive antibody (%), body mass index, and pre-transplant dialysis.

**Appendix 8/Figure S1:** Relative risk of donor acute kidney injury associated with donor urinary biomarkers

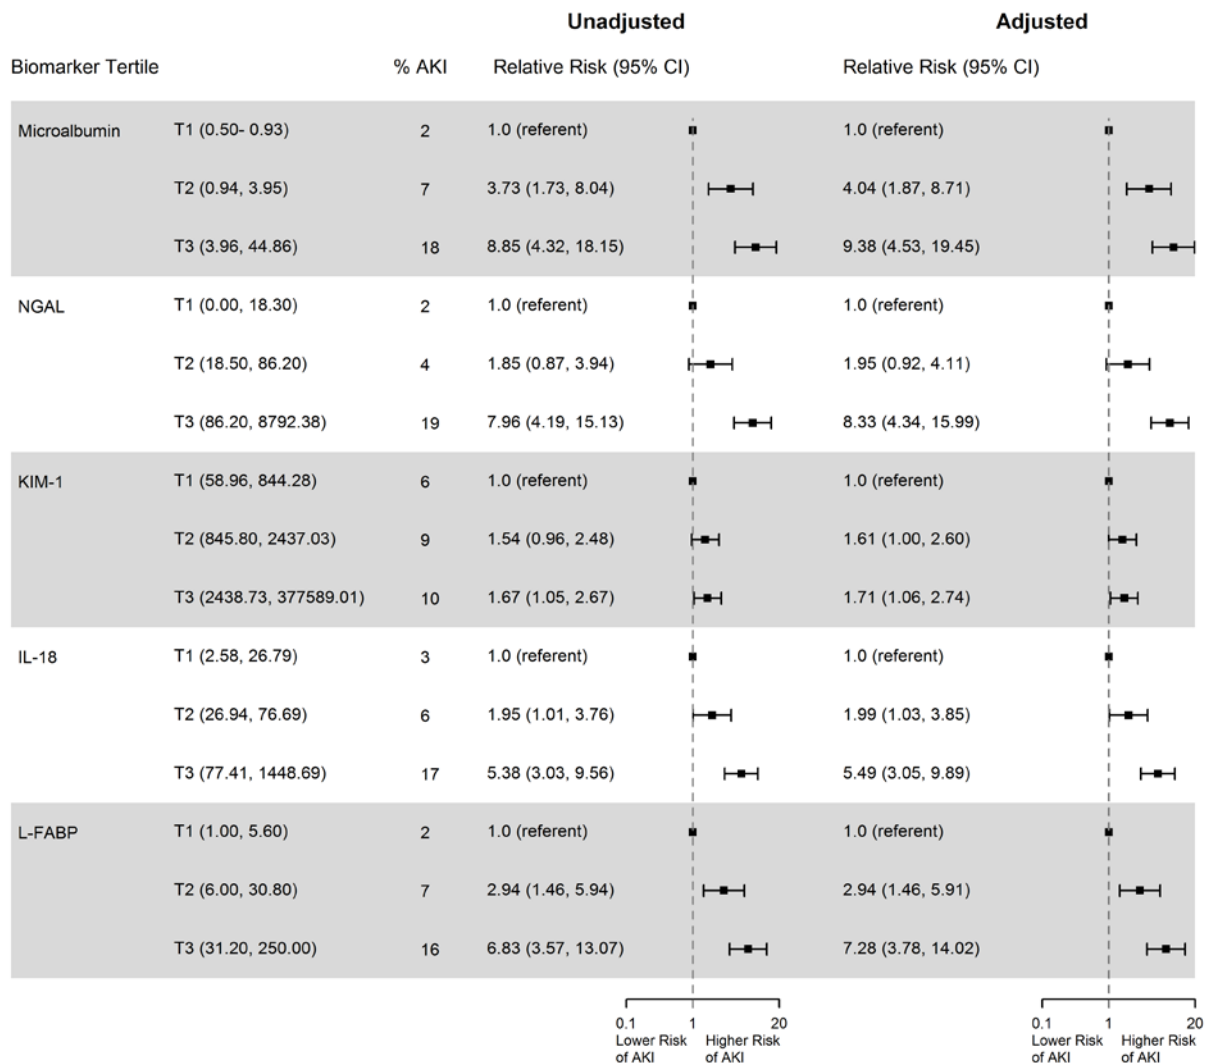

Acute kidney injury (AKI) was defined as at least a 2-fold increase in donor serum creatinine from the admission to terminal value.

NGAL, neutrophil gelatinase associated lipocalin; KIM-1, kidney injury molecule-1, IL-18, interleukin-18; L-FABP, liver-type fatty acid binding protein.

Biomarkers were log (base 2) transformed. Original urinary concentrations are microalbumin, mg/dL; NGAL, ng/mL; KIM-1, pg/mL; IL-18, pg/mL; L-FABP, ng/mL; creatinine, mg/dL.

<sup>1</sup> Adjusted models were adjusted for the donor variables that comprise the Kidney Donor Profile Index, except terminal serum creatinine because it is part of the AKI outcome definition. These are: age (years), height (cm), weight (kg), Black race, history of hypertension, history of diabetes, stroke as cause of death, Hepatitis C serostatus status, and Donation after Circulatory Determination of Death status.

**Appendix 9/Figure S2:** Spline Plots showing the association of donor urinary biomarkers and recipient eGFR, stratified by recipient delayed graft function

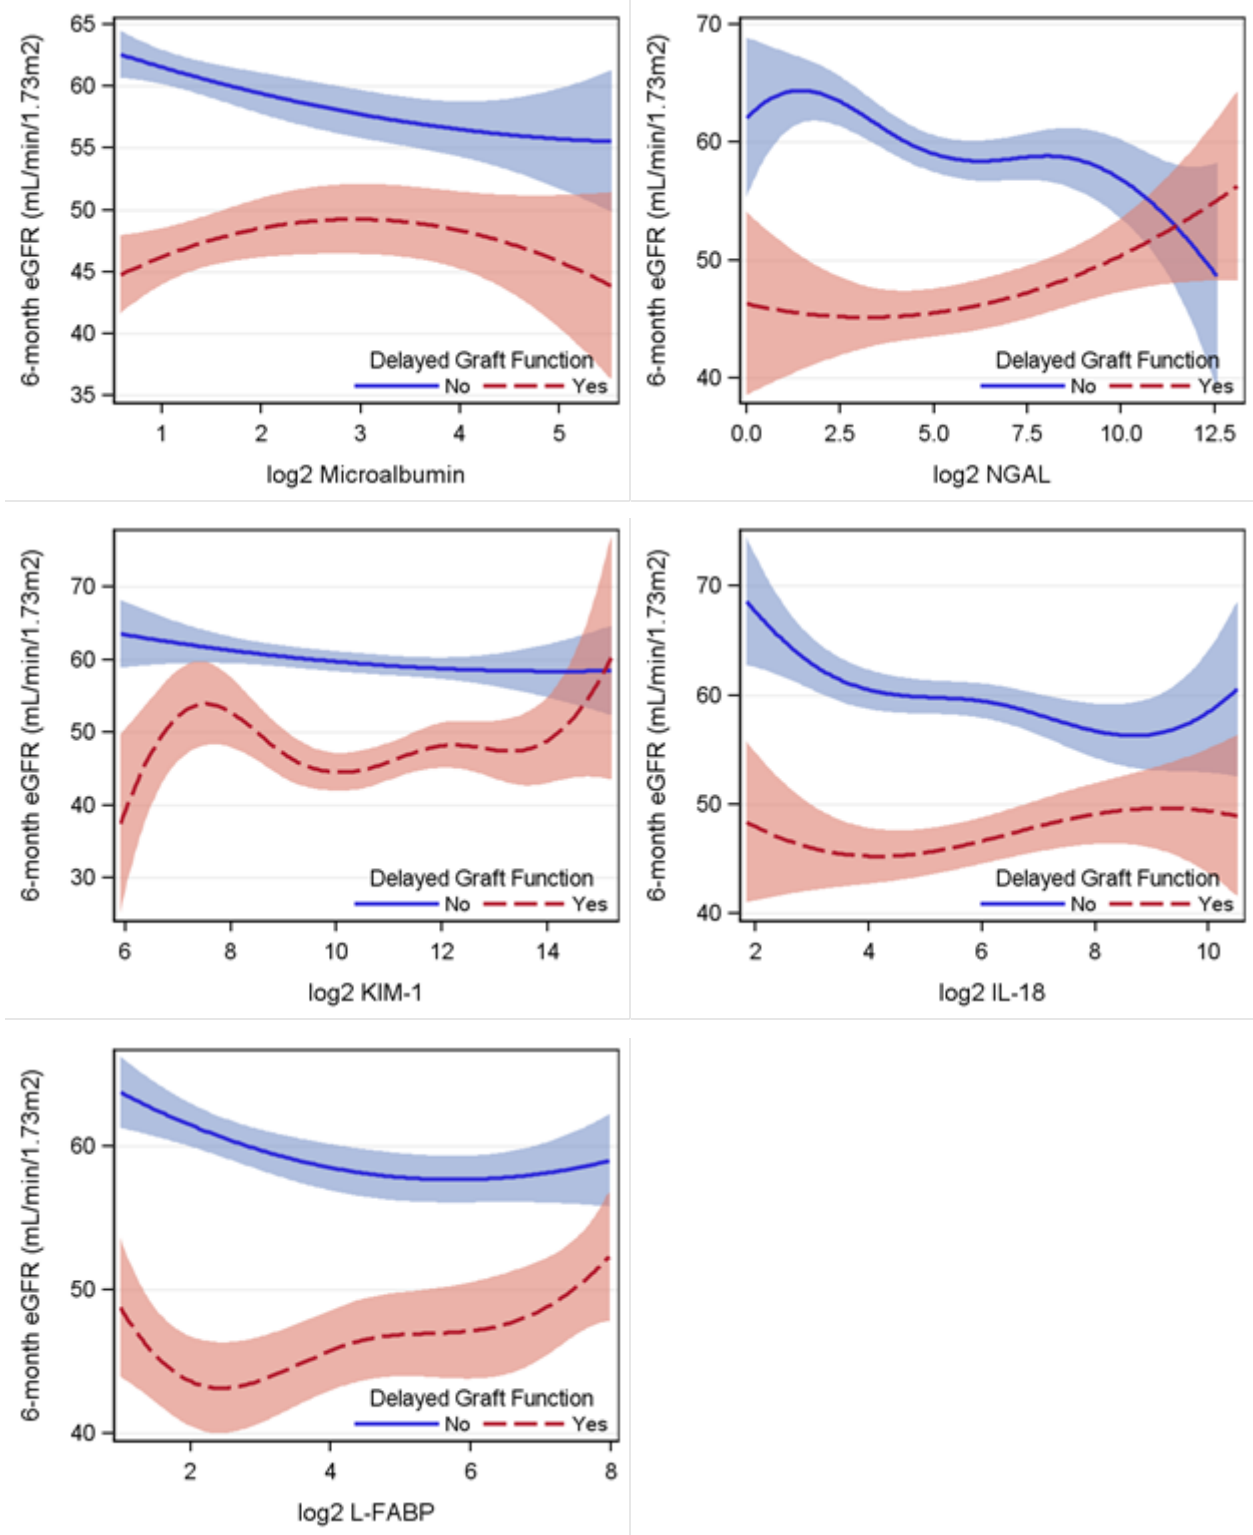

Cubic penalized B-spline curves depicting the unadjusted, bivariate relationship between 6-month eGFR and the indicated log (base 2) transformed biomarkers, stratified by delayed graft function. Splines are based on 5 internal knots. Shaded regions are 95% confidence limits.

## **Appendix 10:** Methods related to measurement of urinary biomarkers

Urine albumin was measured using the immunoturbidimetry assay from Randox on RxDaytona, as per the manufacturer's instructions. Microalbumin calibrators and the urine level 2 and level 3 controls were also obtained from Randox Laboratories (Randox Laboratories, Boston, MA). The minimum detectable concentration of microalbumin is 5.11 mg/L. The inter-assay CV for Level 2 and level 3 urine controls was 3.96 and 5.96% respectively.

Urine NGAL measurement was performed with the Architect platform that is clinically approved for use in Europe (Abbott Diagnostics). The concentration of KIM-1 and IL-18 was measured using the Meso Scale Discovery platform (Meso Scale diagnostics, Gaithersburg, Maryland, USA), which employs proprietary electrochemiluminescence detection methods combined with patterned arrays. The intra-assay coefficient of variation (CV) was <10% and the inter-assay CV for the calibrators was 5.2 – 9.2% and 7.2 – 10.66% for KIM-1 and IL-18 respectively. The average lower limit of detection obtained from 24 runs was 0.43 pg/mL for KIM-1 and 0.169 pg/mL for IL-18. Urine L-FABP was measured using a new method with clinical chemistry analyzers, based on latex-enhanced immunoturbidimetry that employs anti-human L-FABP mouse monoclonal antibodies. The concentration is determined by measuring the change in absorbance that results from agglutination of latex particles. The interassay CV was between 1 – 3.5%. The lower and upper limits of detection were 0.5 ng/mL and 250 ng/mL respectively.
